# Supplementary material
Source: PubMed Central journal article supplement (PMC8652594)
Supplement: jama-e2119885-s001.pdf [file jama-e2119885-s001.pdf]

## Supplemental Online Content

Eliakim-Raz N, et al. Antibody Titer Before and After a Third Dose of the SARS-CoV-2 BNT162b2 Vaccine in Adults  $\geq 60$  Years. *JAMA*. Published online November 5, 2021. doi:10.1001/jama.2021.19885

### eMethods

This supplemental material has been provided by the authors to give readers additional information about their work.

## eMethods

### Assessments

Between August 4, 2021, and August 12, 2021, blood samples were drawn from the study participants, before they received their 3<sup>rd</sup> dose of the BNT162b2 vaccine. Blood samples were drawn again 10-19 days (August 16-24) after the 3<sup>rd</sup> vaccination dose. The samples were immediately transmitted to the microbiological laboratory and the titers of IgG antibodies against the SARS-CoV-2 spike receptor-binding domain were determined using a chemiluminescent microparticle immunoassay (CMIA). The assay was performed using the Abbott architect i2000sr platform, in accordance with the manufacturer's package insert for SARS-CoV-2 IgG II Quant assay (Abbott Laboratories, Abbott Park, IL, USA; reference 6S60-22).<sup>1</sup> The strength of the response (in relative light units [RLU]) is determined relative to IgG II calibrator/standard indicates, and reflects the quantity of IgG antibodies present. The assay is 98.1% sensitive  $\geq 15$  days after COVID-19 symptoms onset or positive PCR test and 99.6% specific.<sup>2</sup> Seropositivity was defined as  $\geq 50$  AU/mL.

### eReferences

1. Abbott. SARS-CoV-2 immunoassay. Accessed October 1, 2021. <https://www.corelaboratory.abbott/int/en/offerings/segments/infectious-disease/sars-cov-2->
2. AdviseDx SARS-CoV-2 IgG II. Package insert. Abbott Laboratories; 2021.
